# Supplementary material for: Anaerobic degradation of a mixture of MtBE, EtBE, TBA, and benzene under different redox conditions
Source: PubMed Central journal article supplement (PMC5852185; doi:10.1007/s00253-018-8853-4), 2018-02-24
Supplement: 253_2018_8853_MOESM1_ESM.pdf [file 253_2018_8853_MOESM1_ESM.pdf]

## **Applied Microbiology and Biotechnology**

### **Anaerobic degradation of MtBE, EtBE, TBA and benzene under different redox conditions**

Marcelle J. van der Waals<sup>#1,2</sup>, Charles Pijls<sup>3</sup>, Anja J.C. Sinke<sup>4</sup>, Alette A.M. Langenhoff<sup>5</sup>, Hauke Smidt<sup>2</sup> and Jan Gerritse<sup>1</sup>

<sup>1</sup>Deltares, Subsurface and Groundwater Systems, Daltonlaan 600, 3584 BK Utrecht, the Netherlands

<sup>2</sup>Wageningen University & Research, Laboratory of Microbiology, Stippeneng 4, 6708 WE Wageningen, the Netherlands

<sup>3</sup>Tauw, Handelskade 37, 7400 AC Deventer, the Netherlands

<sup>4</sup>BP International Limited, Sunbury on Thames, Middlesex TW167BP, UK

<sup>5</sup>Wageningen University & Research, Department of Environmental Technology, Bornse Weilanden 9, 6708 WG, Wageningen, the Netherlands

# Corresponding author

Phone +31 646914584, Fax +31 88 3357856, E-mail: Marcelle.vanderwaals@deltares.nl

## **Carbon Stable Isotope Analysis method 2009**

For stable isotope analysis of MTBE and TBA, extraction from the water phase was carried out using the Stir Bar Sorptive Extraction (SBSE) technique (David and Sandra 2007). The stir bar was loaded with compounds, where after the compounds were thermally extracted from the stir bar in a thermal desorption unit 275°C (TDU, Gerstel, Germany) and introduced into the GC using a Cold Injection System injector (CIS, Gerstel, Germany). This allows measurement of stable isotope ratios of compounds at low concentration. The gas chromatograph (Agilent 6890 series) was equipped with an AT-1 column (30m x 0.32µm x 5µm). The GC temperature program was held at 50°C for 5 min, increased to 120°C at a rate of 10°C/min, isothermal at 5 min, followed by an increase to 300°C at a rate of 35°C/min. After combustion to CO<sub>2</sub>, the stable carbon isotope ratios were determined on a Delta V isotope ratio mass spectrometer (Thermo Finnigan, Bremen, Germany).

**Table S1** Overview of the characteristics of the groundwater used to prepare microcosms in 2009 and 2015

---

| <b>Parameter</b>         | <b>Unit</b> | <b>2009</b> | <b>2015</b> |
|--------------------------|-------------|-------------|-------------|
| Temperature              | °C          | 12          | 11          |
| pH                       |             | 7.5         | 6.9         |
| Conductivity             | µS/cm       | 2080        | 2040        |
| Oxygen                   | mg/l        | 0.3         | 1.1         |
| Dissolved organic carbon | mg/l        | 17.0        | 32.0        |
| Nitrite                  | mg/l        | <0.03       | <0.01       |
| Nitrate                  | mg/l        | <0.9        | <0.05       |
| Sulfate                  | mg/l        | 8.3         | 1.8         |
| Iron (total)             | mg/l        | NA          | 21.0        |

---

NA means no iron (total) measured

**Table S2** Average MtBE, TBA and benzene concentrations in groundwater per layer in  $\mu\text{M}$ 

| Depth below surface<br>level [m] | 2009       |           |           | 2013     |           |           | 2015     |           |           |
|----------------------------------|------------|-----------|-----------|----------|-----------|-----------|----------|-----------|-----------|
|                                  | MtBE       | TBA       | benzene   | MtBE     | TBA       | benzene   | MtBE     | TBA       | benzene   |
| 5-10                             | 534        | 127       | 63        | 14       | 41        | 32        | 9        | 37        | 27        |
| 10-15                            | 6          | -         | 13        | 4        | 7         | 66        | 1        | 7         | 18        |
| 15-20                            | 26         | 24        | 10        | 5        | 23        | 132       | 0        | 16        | 49        |
| 20-25                            | 2          | -         | 0         | 1        | 20        | 5         | 0        | 28        | 0         |
| 25-30                            | 5          | -         | 1         | -        | -         | -         | 0        | 1         | 1         |
| <b>Average (5-25)</b>            | <b>142</b> | <b>75</b> | <b>22</b> | <b>6</b> | <b>23</b> | <b>59</b> | <b>3</b> | <b>22</b> | <b>24</b> |

**Table S3** The amount of electrons released from MtBE and/or benzene, assuming complete oxidation to CO<sub>2</sub>, and the amount of electrons used to reduce sulfate to sulfide, nitrate to nitrogen, iron(III) to iron(II) and chlorate to chloride

| <b>Condition</b>                 | <b>Consumed substrate*<br/>[μM]</b> | <b>Electrons released from<br/>MtBE and/or benzene [μeq]</b> | <b>Electrons used to<br/>reduce acceptor [μeq]</b> |
|----------------------------------|-------------------------------------|--------------------------------------------------------------|----------------------------------------------------|
| <b>Nitrate addition [mol]</b>    |                                     |                                                              |                                                    |
| - medium                         | ND                                  | ND                                                           | ND                                                 |
| + medium with 5% liquid inoculum | 670 (B)                             | 20095                                                        | 23500                                              |
| <b>Chlorate addition [mol]</b>   |                                     |                                                              |                                                    |
| - medium                         | 49 (B)                              | 1461                                                         | 12342                                              |
| + medium                         | 91 (B)                              | 2741                                                         | 11472                                              |
| <b>Iron addition [mol]</b>       |                                     |                                                              |                                                    |
| - medium                         | 77 (B) + 79 (M)                     | 4654                                                         | 180                                                |
| + medium                         | 74 (B) + 510 (M)                    | 17515                                                        | 148                                                |
| <b>Sulfate addition [mol]</b>    |                                     |                                                              |                                                    |
| - medium                         | 158 (B) + 78 (M)                    | 7061                                                         | 11609                                              |
| + medium                         | 115 (B) + 286 (M)                   | 12012                                                        | 14470                                              |

ND means no degradation up to 940 days

\*Consumed substrates were benzene (B) and/or MtBE (M)

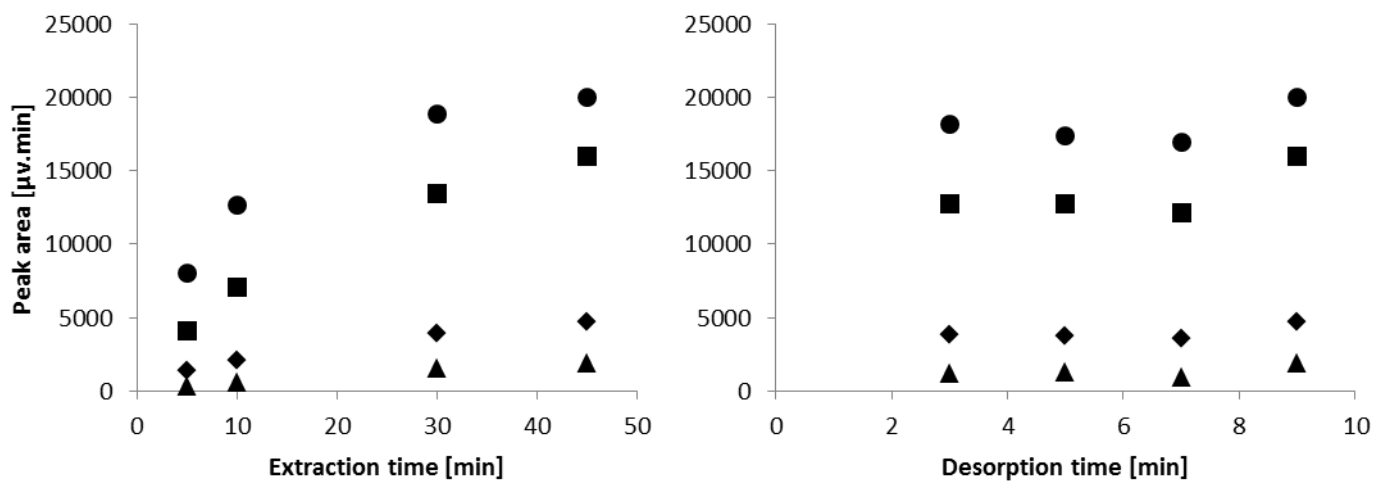

**Figure S1.** Determination of the optimal extraction and desorption time for the GC-FID SPME analysis for MtBE (diamonds), EtBE (squares), TBA (triangles) and benzene (circles)

## References

David F, Sandra P (2007) Stir bar sorptive extraction for trace analysis J Chromatogr A 1152:54-69
